# Supplementary material for: Acacia Holosericea: An Invasive Species for Bio-char, Bio-oil, and Biogas Production
Source: MDPI journal article supplement (doi:10.3390/bioengineering6020033), 2019-04-16
Supplement: s1 [file s1]

Supplementary Materials:

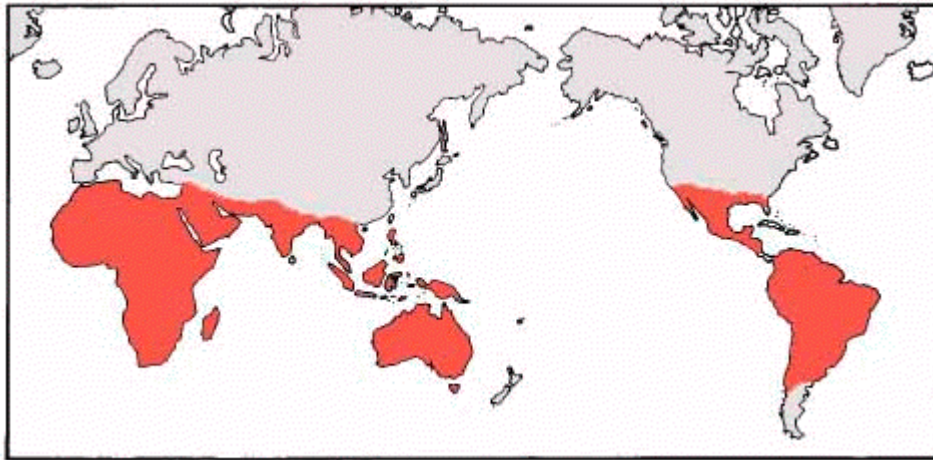

Figure S1. Distribution map of Acacia Species around the world [74].

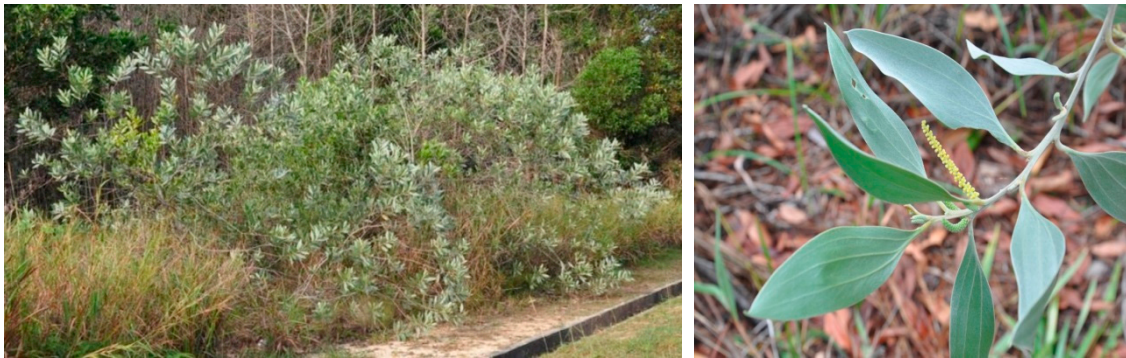

Figure S2. *Acacia Holosericea* in Brunei Darussalam.

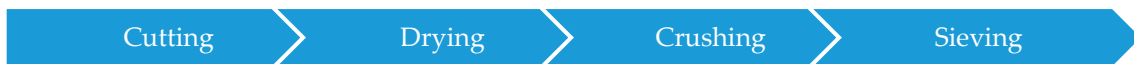

Figure S3. Flow diagram of *Acacia Holosericea* sample preparation.
